# Supplementary material for: A highly effective and self-transmissible CRISPR antimicrobial for elimination of target plasmids without antibiotic selection
Source: PeerJ. 2021 Sep 6;9:e11996. doi: 10.7717/peerj.11996 (PMC8428258; doi:10.7717/peerj.11996)
Supplement: Supplemental Information 2 — Each column summarizes key parameters or finding from each published studies. [file peerj-09-11996-s002.xlsx]

## Sheet: Table S1
First author, Year	Delivery approach	Dose (D-to-R or MOI)	Time	Targeted cell	Antibiotics selection	Efficiency*
Bikard et al 2014	transduction	MOI ~20	1 h	Staphylococcus aureus	No	~1E+4
Citorik et al 2014	transduction	MOI ~20	2 h	Escherichia coli	No	~3.16E+2
	conjugation	340±66:1	3h		Yes	~3.98E+2
	conjugation	340±66:1	3h		No	~5.00E+1
Yosef et al 2015	transduction	MOI ~10	3 h	Escherichia coli	No	~5.01E+2
Kim et al 2016	conjugation	1:10 or 1:100	3 h	Escherichia coli	Yes	No quantitative data
Dong et al 2019	conjugation	1:1	8h	Escherichia coli	Yes	~2.00E+2
Wang et al 2019	conjugation	1:1	3h	Escherichia coli	Yes	~9.00E+0
Hamilton et al 2019	conjugation	(1:1, 1:5, 10:1, and 50:1)	24 h	Salmonella enterica	Yes	(100% killing)
Rodrigues et al 2019	conjugation	1:9	24h	Enterococcus faecalis	Yes	~1E+5
Ruotsalainen et al 2019	conjugation	1:3 and 20:7	24 h	Escherichia coli	Yes	~200
Ruotsalainen et al 2019	conjugation	1:3 and 20:7	24 h	Escherichia coli	No	~3
				*fold reduction of the amount of surviving cells in CRISPR treatement compared to negative control
Supplementary Table S1
