# Supplementary material for: A highly effective and self-transmissible CRISPR antimicrobial for elimination of target plasmids without antibiotic selection
Source: PeerJ. 2021 Sep 6;9:e11996. doi: 10.7717/peerj.11996 (PMC8428258; doi:10.7717/peerj.11996)
Supplement: Supplemental Information 3 [file peerj-09-11996-s003.xlsx]

## Sheet: Table S2A
Bacteria		Relevant features			sources
E.coli EcGT2		Δasd::mCherry;Spec			Ronda et al 2019
E.coli SAR08		CSH26 attBk::bla-lacIQ1;Amp			Reisner et al 2002
ID		Relevant features	AbR	OriR	sources
pHELP		Conjugative plasmid, derivative of RK2	Tc, Ap	RK2	pRL443 from Elah et al 1997
pgNDM1		Cas9; tracrRNA; gRNA targeting NDM1 gene; OriT	Cm	R1162	pMM441 from Addgene #61271
pEMPTY		Cas9; tracrRNA; sgRNA with BsaI; OriT	Cm	R1162	This study
ptGFP		GFP; OriT	Km	pBBR1	This study
ptNDM1		NDM1 fragment; OriT	Km	pBBR1	This study
Primer ID	Sequence
TS18	GAAACACGCATTGATTTGAGTCAGC
TS19	GAAGTCGCTTGATATCTAGTATGACGTCTG
TS37	GGCCGCTCTAGAGACCAACGGTTTGGCGATCTG
TS38	GAATTCCTGCAGCCAAAGTTGGGCGCGGTTG
TS121	AGGCTGGTCTCTAACTGCTGCCATTTTTGGGGTGAGG
TS122	AGGCTGGTCTCTGACGGGGATGTGCTGCAAGGCG
TS151	AGGCTGGTCTCTAACTGTCTTGGACTCCTGTTGATAGATCCAG
TS152	AGGCTGGTCTCTGACGGACTTGTTGAGTTGAATTCGCGCG
TS153	AGGCTGGTCTCTCGTCCAACCCCAAAGGTCTACTACCGTG
TS154	AGGCTGGTCTCTAGTTCCCCAATGATAACCCCAAGGGAAG
TS170	GCATGCCTGCAGGTTTAAACTCAATGATGATGATGATGATGGTCG
TS171	CTCACGTGGTCTCAGTTTTAGAGCTAGAAATAGCAAGTTAAAATAAGGC
TS172	CCTAGGTATAATACTAGTGGAGACCTCACGTGGTCTCAGTTTTAGAGC
TS173	ATCCTCTAGATTGACAGCTAGCTCAGTCCTAGGTATAATACTAGTGGAGACCTCAC
TS174	AGGCTGGTCTCTCGTCAACGGTTTGGCGATCTGGTTTTC
TS175	AGGCTGGTCTCTAGTTAAAGTTGGGCGCGGTTGC
TS201	AAGGTCTCAAAACTTGACATCACCATCCAGTTCCACCACTAAGAGACCGA
TS202	GACTGGTCTCTAAAAGGAGCACTGTCCGACCGCTTGTTTAGAGACCTTAT
Supplementary Table S2
