# Supplementary material for: A highly effective and self-transmissible CRISPR antimicrobial for elimination of target plasmids without antibiotic selection
Source: PeerJ. 2021 Sep 6;9:e11996. doi: 10.7717/peerj.11996 (PMC8428258; doi:10.7717/peerj.11996)
Supplement: Supplemental Information 4 [file peerj-09-11996-s004.xlsx]

## Sheet: Table S3A
Donor	Recipient	Antibiotic	CFU/ml	Antibiotic	CFU/ml	Antibiotic	CFU/ml	Cm/Km (transconjugatant/recipients)
EcGT2:pgNDM1	SAR08/ptNDM1	Cm	42000000	Km	98000000000	CmKm	206000	0.000428571
EcGT2:pgGFP	SAR08/ptNDM1	Cm	500000000	Km	11200000000	CmKm	420000000	0.0446429
EcGT2:pgNDM1	SAR08/ptGFP	Cm	5600000000	Km	562000000000	CmKm	6200000000	0.00996441
EcGT2:pgGFP	SAR08/ptGFP	Cm	94000000000	Km	570000000000	CmKm	11000000	0.164912
EcGT2:pgNDM1	SAR08/ptNDM1	Cm	1080000000	Km	340000000000	CmKm	138000	0.00317647
EcGT2:pgGFP	SAR08/ptNDM1	Cm	7600000000	Km	270000000000	CmKm	7200000000	0.0281481
EcGT2:pgNDM1	SAR08/ptGFP	Cm	420000000	Km	72000000000	CmKm	208000000	0.00583333
EcGT2:pgGFP	SAR08/ptGFP	Cm	84000000000	Km	420000000000	CmKm	9000000000	0.2
EcGT2:pgNDM1	SAR08/ptNDM1	Cm	44000000	Km	42000000000	CmKm	1060000	0.00104762
EcGT2:pgGFP	SAR08/ptNDM1	Cm	40000000000	Km	370000000000	CmKm	66000000000	0.108108
EcGT2:pgNDM1	SAR08/ptGFP	Cm	360000000	Km	360000000000	CmKm	4200000000	0.001
EcGT2:pgGFP	SAR08/ptGFP	Cm	3800000000	Km	236000000000	CmKm	940000000	0.0161017
Raw data for Figure 1C experiment

## Sheet: Table S3B
Donor	Recipient	Antibiotic -1	CFU/ml -1	(G/W) -1	%G -1	Antibiotic -2	CFU/ml -2	(G/W) -2	%G -2	Antibiotic -3	CFU/ml -3	(G/W) -3	%G -3	Efficiency 1/2	Efficiency 3/2
EcGT2:pgNDM1	SAR08:ptNDM1//SAR08:ptGFP	Cm	12200000	10/61	14	Km	5200000000	60/260	18.75	CmKm	5200000000	56/0	100	0.00234615	1
EcGT2:pgGFP	SAR08:ptNDM1//SAR08:ptGFP	Cm	400000000	0/20	0	Km	1060000000	5/53	8.62	CmKm	1060000000	34/160	17.53	0.377358	1
EcGT2:pgNDM1	SAR08:ptNDM1//SAR08:ptGFP	Cm	192000000	15/81	15.6	Km	3980000000	94/105	47.24	CmKm	1680000000	84/0	100	0.0482412	0.422111
EcGT2:pgGFP	SAR08:ptNDM1//SAR08:ptGFP	Cm	156000000	6/72	7.69	Km	2660000000	62/71	46.62	CmKm	1540000000	11/66	14.29	0.0586466	0.578947
EcGT2:pgNDM1	SAR08:ptNDM1//SAR08:ptGFP	Cm	178000000	28/61	31.46	Km	11600000000	24/34	41.38	CmKm	44000000	22/0	100	0.0153448	0.0037931
EcGT2:pgGFP	SAR08:ptNDM1//SAR08:ptGFP	Cm	880000000	10/34	22.73	Km	12200000000	26/35	42.62	CmKm	820000000	2020-12-29	29.27	0.0721311	0.0672131
EcGT2:pgNDM1	SAR08:ptNDM1//SAR08:ptGFP	Cm	124000000	25/37	40.32	Km	8400000000	22/20	52.38	CmKm	54000000	27/0	100	0.0147619	0.00642857
EcGT2:pgGFP	SAR08:ptNDM1//SAR08:ptGFP	Cm	940000000	10/37	21.28	Km	9400000000	18/29	38.3	CmKm	680000000	2020-08-26	23.53	0.1	0.0723404
	G/W = green colinies/white colonies
	%G = % of green colonies
	Efficeincy = transconjugants/recipients
Raw data for Figure 1E experiment

## Sheet: Table S3C
Donor	Recipient	Antibiotic -1	CFU/ml -1	Antibiotic -2	CFU/ml -2	Antibiotic -3	CFU/ml -3	Antibiotic -4	CFU/ml -4	Efficiency 2/1	Efficiency 3/1	Efficiency 4/1	ratio (D/R)
EcGT2:pHELP+pgNDM1	SAR08	LB	66000000000	Cm	38000000000	Tc	40000000000	CmTc	3600000000	0.575758	0.606061	0.0545455	01:10:00
EcGT2:pgNDM1	SAR08	LB	320000000000	Cm	28000000000	NA				0.0875	NA	NA	01:10:00
EcGT2:pHELP+pgNDM1	SAR08	LB	44000000000	Cm	30000000000	Tc	52000000000	CmTc	3200000000	0.681818	1.18182	0.0727273	01:10:00
EcGT2:pgNDM1	SAR08	LB	440000000000	Cm	26000000000	NA				0.0590909	NA	NA	01:10:00
EcGT2:pHELP+pgNDM1	SAR08	LB	38000000000	Cm	28000000000	Tc	26000000000	CmTc	3200000000	0.736842	0.684211	0.0842105	01:10:00
EcGT2:pgNDM1	SAR08	LB	240000000000	Cm	34000000000	NA				0.141667	NA	NA	01:10:00
EcGT2:pHELP+pgNDM1	SAR08	LB	42300000000	Cm	21000000000	Tc	30000000000	CmTc	7700000000	0.496454	0.70922	0.182033	1:100
EcGT2:pgNDM1	SAR08	LB	122000000000	Cm	700000000	NA				0.0057377	NA	NA	1:100
EcGT2:pHELP+pgNDM1	SAR08	LB	51000000000	Cm	18300000000	Tc	10400000000	CmTc	4000000000	0.358824	0.203922	0.0784314	1:100
EcGT2:pgNDM1	SAR08	LB	390000000000	Cm	440000000	NA				0.00112821	NA	NA	1:100
EcGT2:pHELP+pgNDM1	SAR08	LB	411000000000	Cm	42000000000	Tc	74000000000	CmTc	9200000000	0.10219	0.180049	0.0223844	1:100
EcGT2:pgNDM1	SAR08	LB	134000000000	Cm	540000000	NA				0.00402985	NA	NA	1:100
	G/W = green colinies/white colonies
	Efficeincy = transconjugants/recipients
	D/R = donors-to-recipients ratio
	NA = not applicable
Raw data for Figure 2B experiment

## Sheet: Table S3D
Donor	Recipient	Antibiotic -1	CFU/ml -1	Antibiotic -2	CFU/ml -2	Antibiotic -3	CFU/ml -3	Antibiotic -4	CFU/ml -4	Efficiency 2/1	Efficiency 3/1	Efficiency 4/1
EcGT2:pHELP	SAR08	LB	320000000000	NA	NA	Tc	280000000000	NA	NA	NA	0.875	NA
EcGT2:pHELP	SAR08	LB	440000000000	NA	NA	Tc	380000000000	NA	NA	NA	0.863636	NA
EcGT2:pHELP	SAR08	LB	680000000000	NA	NA	Tc	540000000000	NA	NA	NA	0.794118	NA
EcGT2:pHELP+pgNDM1	SAR08	LB	42300000000	Cm	21000000000	Tc	30000000000	CmTc	7700000000	0.496454	0.70922	0.182033
EcGT2:pgNDM1	SAR08	LB	122000000000	Cm	700000000	NA	NA	NA	NA	0.0057377	NA	NA
EcGT2:pHELP+pgNDM1	SAR08	LB	51000000000	Cm	18300000000	Tc	10400000000	CmTc	4000000000	0.358824	0.203922	0.0784314
EcGT2:pgNDM1	SAR08	LB	390000000000	Cm	440000000	NA	NA	NA	NA	0.00112821	NA	NA
EcGT2:pHELP+pgNDM1	SAR08	LB	411000000000	Cm	42000000000	Tc	74000000000	CmTc	9200000000	0.10219	0.180049	0.0223844
EcGT2:pgNDM1	SAR08	LB	134000000000	Cm	540000000	NA	NA	NA	NA	0.00402985	NA	NA
	Efficeincy = transconjugants/recipients
	NA = not applicable
Raw data for Figure 2C experiment

## Sheet: Table S3E
Donor	Recipient	time	Ab-0	CFU-0	Ab-1	CFU-1	Efficeincy 1/0	Ab-2	CFU-2	Efficeincy 2/0	Ab-3	CFU-3	Efficeincy 3/0
EcGT2:pHELP+pgNDM1	SAR08	0	LB	33200000	Cm	128	3.85542e-06	Tc	180	5.42169e-06	CmTc	82	2.46988e-06
EcGT2:pHELP+pgNDM1	SAR08	0	LB	31600000	Cm	120	3.79747e-06	Tc	118	3.73418e-06	CmTc	80	2.53165e-06
EcGT2:pHELP+pgNDM1	SAR08	0	LB	32400000	Cm	112	3.45679e-06	Tc	170	5.24691e-06	CmTc	84	2.59259e-06
EcGT2:pHELP+pgNDM1	SAR08	10	LB	35400000	Cm	2200	6.21469e-05	Tc	340	9.60452e-06	CmTc	260	7.34463e-06
EcGT2:pHELP+pgNDM1	SAR08	10	LB	34400000	Cm	2400	6.97674e-05	Tc	308	8.95349e-06	CmTc	242	7.03488e-06
EcGT2:pHELP+pgNDM1	SAR08	10	LB	35200000	Cm	2600	7.38636e-05	Tc	316	8.97727e-06	CmTc	264	7.5e-06
EcGT2:pHELP+pgNDM1	SAR08	60	LB	346000000	Cm	30000	8.67052e-05	Tc	12400	3.58382e-05	CmTc	4600	1.32948e-05
EcGT2:pHELP+pgNDM1	SAR08	60	LB	288000000	Cm	32000	0.000111111	Tc	11000	3.81944e-05	CmTc	4000	1.38889e-05
EcGT2:pHELP+pgNDM1	SAR08	60	LB	326000000	Cm	37200	0.00011411	Tc	12800	3.92638e-05	CmTc	4200	1.28834e-05
EcGT2:pHELP+pgNDM1	SAR08	120	LB	350000000	Cm	300000	0.000857143	Tc	460000	0.00131429	CmTc	76000	0.000217143
EcGT2:pHELP+pgNDM1	SAR08	120	LB	354000000	Cm	280000	0.00079096	Tc	411000	0.00116102	CmTc	72000	0.00020339
EcGT2:pHELP+pgNDM1	SAR08	120	LB	372000000	Cm	316000	0.000849462	Tc	440000	0.0011828	CmTc	78000	0.000209677
EcGT2:pHELP+pgNDM1	SAR08	240	LB	5600000000	Cm	300000	5.35714e-05	Tc	880000	0.000157143	CmTc	112000	2e-05
EcGT2:pHELP+pgNDM1	SAR08	240	LB	5200000000	Cm	320000	6.15385e-05	Tc	820000	0.000157692	CmTc	102000	1.96154e-05
EcGT2:pHELP+pgNDM1	SAR08	240	LB	5400000000	Cm	380000	7.03704e-05	Tc	860000	0.000159259	CmTc	118000	2.18519e-05
EcGT2:pHELP+pgNDM1	SAR08	1440	LB	42600000000	Cm	12000000	0.00028169	Tc	540000000	0.0126761	CmTc	5600000	0.000131455
EcGT2:pHELP+pgNDM1	SAR08	1440	LB	38000000000	Cm	28000000	0.000736842	Tc	520000000	0.0136842	CmTc	5200000	0.000136842
EcGT2:pHELP+pgNDM1	SAR08	1440	LB	42000000000	Cm	24000000	0.000571429	Tc	580000000	0.0138095	CmTc	5400000	0.000128571
EcGT2:pHELP+pgNDM1	SAR08	2880	LB	53000000000	Cm	28000000000	0.528302	Tc	52000000000	0.981132	CmTc	4800000000	0.090566
EcGT2:pHELP+pgNDM1	SAR08	2880	LB	50000000000	Cm	26000000000	0.52	Tc	51000000000	1.02	CmTc	4400000000	0.088
EcGT2:pHELP+pgNDM1	SAR08	2880	LB	54000000000	Cm	28800000000	0.533333	Tc	53000000000	0.981481	CmTc	4600000000	0.0851852
	Ab = antibiotics selection
	CFU = the number of cells (CFU/ml)
	Efficeincy = transconjugants/recipients
	NA = not applicable
Raw data for Figure 2D experiment

## Sheet: Table S3F
Donor	Recipient (1:100)	Antibiotic -1	CFU/ml -1	Antibiotic -2	CFU/ml -2	Antibiotic -3	CFU/ml -3	Antibiotic -4	CFU/ml -4
EcGT2	SAR08/pPSNU34+SAR08	LB	74000000000	Km	112000000	Cm	-	Tc	-
EcGT2	SAR08/pPSNU34+SAR08	LB	92000000000	Km	154000000	Cm	-	Tc	-
EcGT2	SAR08/pPSNU34+SAR08	LB	40000000000	Km	96000000	Cm	-	Tc	-
EcGT2/pRL443	SAR08/pPSNU34+SAR08	LB	30000000000	Km	4300000000	Cm	-	Tc	580000000
EcGT2/pRL443	SAR08/pPSNU34+SAR08	LB	52000000000	Km	4160000000	Cm	-	Tc	740000000
EcGT2/pRL443	SAR08/pPSNU34+SAR08	LB	44000000000	Km	4620000000	Cm	-	Tc	620000000
EcGT2/pMM441	SAR08/pPSNU34+SAR08	LB	38000000000	Km	240000	Cm	240000	Tc	-
EcGT2/pMM441	SAR08/pPSNU34+SAR08	LB	34000000000	Km	260000	Cm	260000	Tc	-
EcGT2/pMM441	SAR08/pPSNU34+SAR08	LB	92000000000	Km	340000	Cm	240000	Tc	-
EcGT2/pMM441/pRL443	SAR08/pPSNU34+SAR08	LB	38000000000	Km	21600000	Cm	480000	Tc	600000000
EcGT2/pMM441/pRL443	SAR08/pPSNU34+SAR08	LB	66000000000	Km	22600000	Cm	580000	Tc	300000000
EcGT2/pMM441/pRL443	SAR08/pPSNU34+SAR08	LB	28000000000	Km	25400000	Cm	720000	Tc	820000000
	Ab = antibiotics selection
	CFU = the number of cells (CFU/ml)
	NA = not applicable
Raw data for Figure 2E experiment

## Sheet: Table S3G
Donor	Recipient	Antibiotic -1	CFU/ml -1	G/W -1	Antibiotic -2	CFU/ml -2	G/W -2	Efficeincy 1/2
EcGT2:pEMPTY+ptGFP	SAR08:ptNDM1	Cm	6000000	0/30	Km	1040000000	0/52	0.00576923
EcGT2:pgNDM1+ptGFP	SAR08:ptNDM1	Cm	11000000	44/11	Km	6600000000	2020-03-30	0.00166667
EcGT2:pEMPTY+ptGFP	SAR08:ptNDM1	Cm	7400000	0/37	Km	3000000000	0/15	0.00246667
EcGT2:pgNDM1+ptGFP	SAR08:ptNDM1	Cm	44000000	13/10	Km	9200000000	8/35	0.00478261
EcGT2:pEMPTY+ptGFP	SAR08:ptNDM1	Cm	6800000	0/44	Km	4600000000	0/23	0.00147826
EcGT2:pgNDM1+ptGFP	SAR08:ptNDM1	Cm	32000000	16/10	Km	8800000000	7/37	0.00363636
	G/W = green colinies/white colonies
	Efficeincy = transconjugants/recipients
Raw data for Figure 3 experiment

## Sheet: Table S3H
donor	Recipient	Antibiotic -1	CFU/ml -1	G/W-1	%G-1	Antibiotic -2	CFU/ml -2	G/W-2	%G-2	Antibiotic -3	CFU/ml -3	G/W-3	%G-3	Antibiotic -4	CFU/ml -4	G/W-4	%G-4	Efficiency 1//2	Efficiency 3/2	Efficiency 4/2
EcGT2:pHELP:pgNDM1	SAR08:ptNDM1 SAR08:ptGFP	Cm	4400000000	18/4	81.82	Km	82000000000	27/14	65.85	CmKm	46000000000	20/3	86.96	Tc	5000000000	21/4	84	0.0536585	0.560976	0.0609756
EcGT2:pgNDM1	SAR08:ptNDM1 SAR08:ptGFP	Cm	760000000	21/17	55.26	Km	88000000000	17/27	38.64	CmKm	70000000	25/10	71.43	NA				0.00863636	NA
EcGT2:pHELP:pgNDM1	SAR08:ptNDM1 SAR08:ptGFP	Cm	5400000000	22/5	73.33	Km	68000000000	24/10	70.59	CmKm	56000000000	28/0	100	Tc	5000000000	19/6	76	0.0794118	0.823529	0.0735294
EcGT2:pgNDM1	SAR08:ptNDM1 SAR08:ptGFP	Cm	560000000	19/9	67.86	Km	60000000000	2020-11-19	36.67	CmKm	28000000	14/0	100	NA				0.00933333	NA
EcGT2:pHELP:pgNDM1	SAR08:ptNDM1 SAR08:ptGFP	Cm	4000000000	18/2	90	Km	68000000000	22/12	64.71	CmKm	40000000000	20/0	100	Tc	5800000000	25/4	86.21	0.0588235	0.588235	0.0852941
EcGT2:pgNDM1	SAR08:ptNDM1 SAR08:ptGFP	Cm	600000000	19/11	63.33	Km	80000000000	16/24	40	CmKm	44000000	22/0	100	NA				0.0075	NA
EcGT2:pHELP:pgNDM1	SAR08:ptNDM1 SAR08:ptGFP	Cm	5200000000	20/6	76.92	Km	80000000000	29/11	72.5	CmKm	54000000000	27/0	100	Tc	4000000000	17/3	85	0.065	0.675	0.05
EcGT2:pgNDM1	SAR08:ptNDM1 SAR08:ptGFP	Cm	760000000	23/15	60.53	Km	78000000000	17/22	43.59	CmKm	42000000	21/0	100	NA				0.00974359	NA
		G/W = green colinies/white colonies
		CFU = the number of cells (CFU/ml)
		Efficeincy = transconjugants/recipients
		%G = % of green colonies
		NA = not applicable
Raw data for Figure 4B experiment

## Sheet: Table S3I
Donor	Recipient	Ab -0	CFU -0	%G -0	Ab-1	CFU-1	efficiency 1/0	%G-1	Ab-2	CFU-2	efficiency 2/0	%G-2	Ab-3	CFU-3	efficiency 3/0	%G-3	Ab-4	CFU-4	efficiency 4/0	%G-4
EcGT2:pHELP+pgNDM1+ptGFP	SAR08/34	LB	44000000000	100	Km	22000000000	0.5	100	Tc	48000000000	1.09091	100	Cm	20000000000	0.454545	100	CmKm	36000000000	0.818182	100
EcGT2:pgNDM1+ptGFP	SAR08/34	LB	28000000000	42.86	Km	22000000000	0.785714	45.45	Tc	NA			Cm	30000000	0.00107143	53.33	CmKm	48000000	0.00171429	100
EcGT2:pHELP+pgNDM1+ptGFP	SAR08/34	LB	30000000000	100	Km	32000000000	1.06667	100	Tc	34000000000	1.13333	100	Cm	28000000000	0.933333	100	CmKm	48000000000	1.6	100
EcGT2:pgNDM1+ptGFP	SAR08/34	LB	32000000000	50	Km	40000000000	1.25	40	Tc	NA			Cm	32000000	0.001	60	CmKm	50000000	0.0015625	100
EcGT2:pHELP+pgNDM1+ptGFP	SAR08/34	LB	36000000000	100	Km	26000000000	0.722222	100	Tc	42000000000	1.16667	100	Cm	30000000000	0.833333	100	CmKm	42000000000	1.16667	100
EcGT2:pgNDM1+ptGFP	SAR08/34	LB	42000000000	47.62	Km	36000000000	0.857143	44.44	Tc	NA			Cm	20000000	0.00047619	60	CmKm	36000000	0.000857143	100
	Ab = antibiotics
	CFU = the number of cells (CFU/ml)
	Efficeincy = transconjugants/recipients
	%G = % of green colonies
	NA = not applicable
Raw data for Figure 4C experiment
Supplementary Table S3
