# Supplementary material for: A highly effective and self-transmissible CRISPR antimicrobial for elimination of target plasmids without antibiotic selection
Source: PeerJ. 2021 Sep 6;9:e11996. doi: 10.7717/peerj.11996 (PMC8428258; doi:10.7717/peerj.11996)
Supplement: Supplemental Information 5 [file peerj-09-11996-s005.xlsx]

## Sheet: Sheet1
CFU estimation at OD600 = 0.3
	strain	repeate	number of colonies	plated volume (ml)	Dilution factor	CFU/ml
	SAR08 (recipient)	1	249	0.1	100000	249000000
		2	315	0.1	100000	315000000
		3	336	0.1	100000	336000000
		4	347	0.1	100000	347000000
		5	456	0.1	100000	456000000
	EcGT2/pCRISPR (donor)	1	196	0.1	100000	196000000
		2	268	0.1	100000	268000000
		3	202	0.1	100000	202000000
		4	110	0.1	100000	110000000
		5	166	0.1	100000	166000000
Estimated cfu/ml at OD600 = 1			cfu/ml (average)	cfu/ml (SD)
	SAR08 (recipient)		1140000000	250000000
	EcGT2/ pCRISPR (donor)		630000000	190000000
	cfu of recipient / cfu of donor at the same OD600			1.80952
Supplementary Table S4
